# Supplementary material
Source: MDPI journal article supplement (https://www.mdpi.com/2073-4395/13/12/2910)
Supplement: s1 [file s1]

Supplementary Figures and Tables

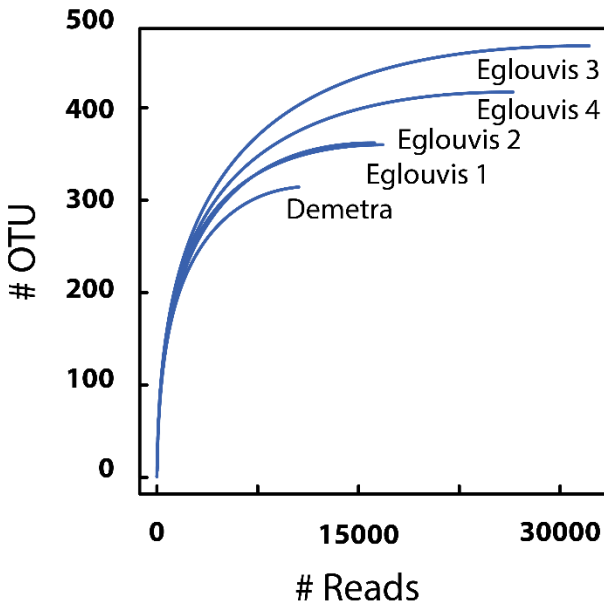

Figure S1. Rarefaction curves of lentil samples.

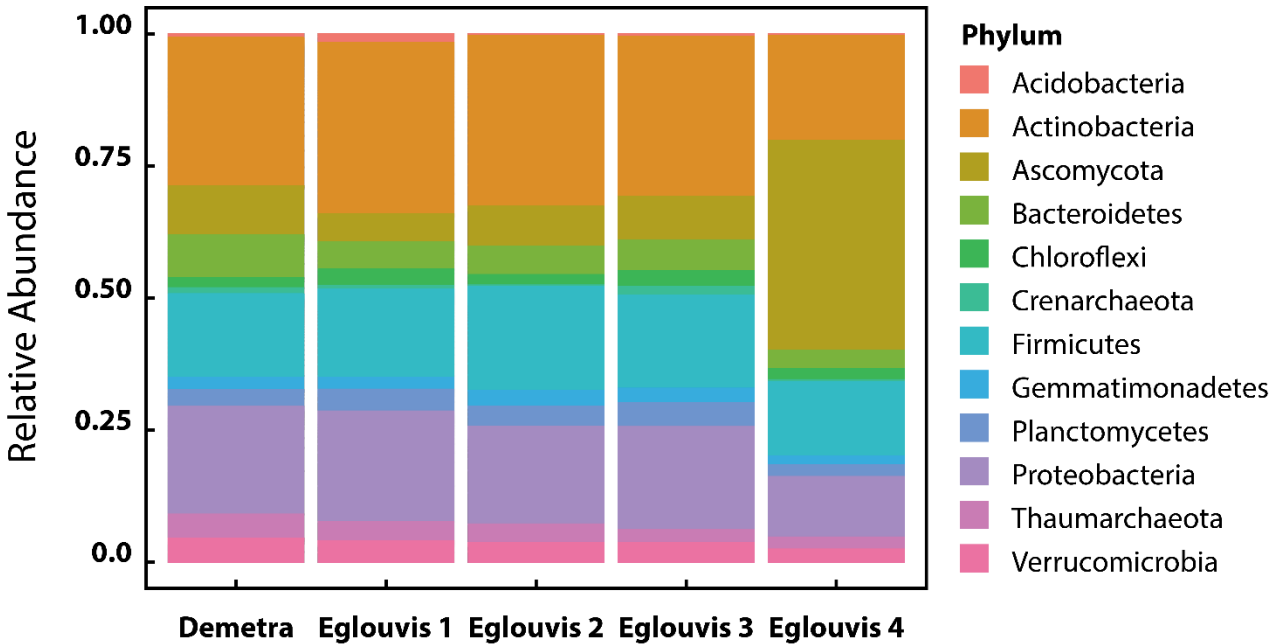

Figure S2: Relative abundances of lentil samples for the 12 most abundant phyla including pathogen *Kabatiella microsticta*.

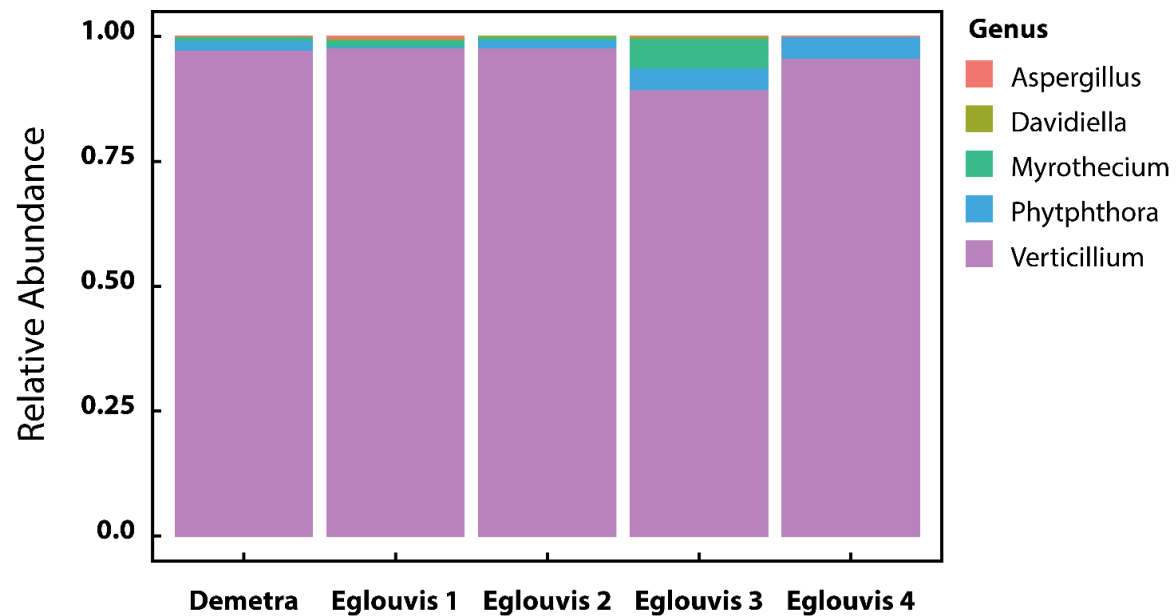

Figure S3. Relative abundances of lentil samples for the pathogens at genus level.

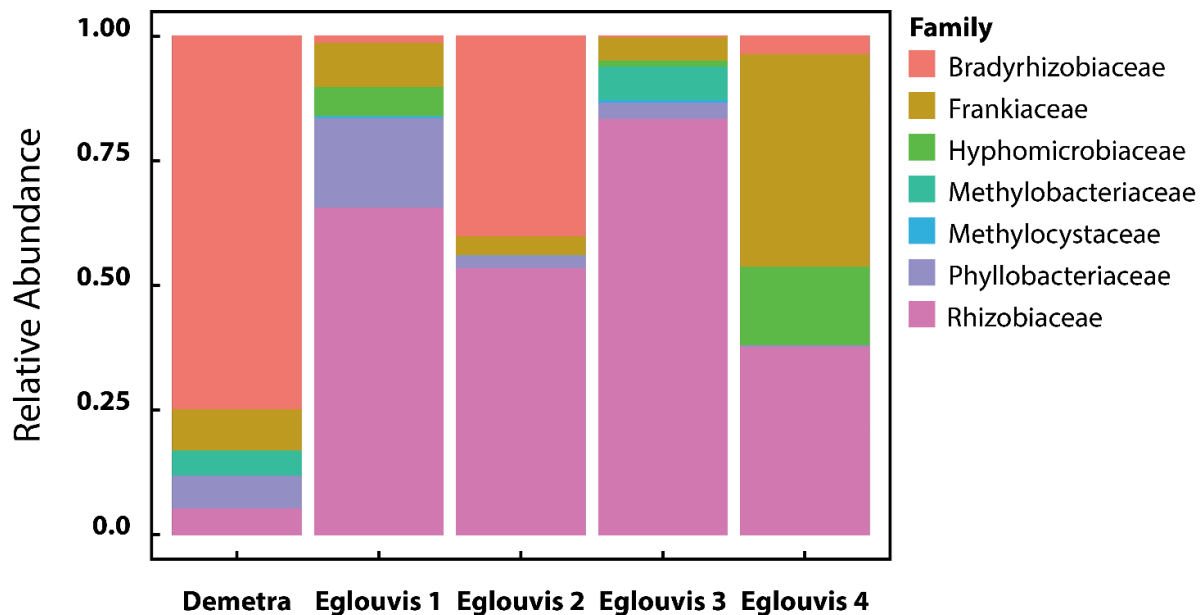

Figure S4. Relative abundances of lentil samples for N<sub>2</sub>-fixation bacteria at family level.

**Table S1.** Amplicon primers, PCR reagents, and PCR cycling program.

|                                        | PCR for 16S amplicons              | PCR for ITS2 amplicons             |
|----------------------------------------|------------------------------------|------------------------------------|
| <b>Amplicon primers</b>                |                                    |                                    |
| Forward primer                         | 515F<br>5'-GTGCCAGCMGCCGCGGTAA-3'  | ITS4<br>5'-TCCTCCGCTTATTGATATGC-3' |
| Reverse primer                         | 806R<br>5'-GGACTACHVHHHTWTCTAAT-3' | ITS9<br>5'-GAACGCAGCRAAIIIGYGA-3'  |
| <b>PCR reagents' recipe</b>            |                                    |                                    |
| gDNA template<br>(10 ng.µL)            | 3 µL                               | 3 µL                               |
| Forward primer<br>(10 µM)              | 1 µL                               | 1 µL                               |
| Reverse primer<br>(10 µM)              | 1 µL                               | 1 µL                               |
| 2x Platinum II<br>Hot-Start Master Mix | 25 µL                              | 25 µL                              |
| Molecular water                        | 10 µL                              | 10 µL                              |
| 1x Platinum™<br>GC Enhancer            | 10 µL                              | 10 µL                              |
| Total volume                           | 50 µL                              | 50 µL                              |
| <b>PCR cycling conditions</b>          |                                    |                                    |
| Initial denaturation                   | 94°C for 120 s                     | 94°C for 120 s                     |
| Denaturation                           | 94 °C for 15 s                     | 94°C for 15 s                      |
| Annealing                              | 52°C for 15 s                      | 60°C for 15 s                      |
| Extension                              | 68°C for 15 s                      | 68°C for 15 s                      |
| Cycles                                 | 35                                 | 35                                 |
| Final Hold                             | 4 °C                               | 4 °C                               |

**Table S2.** Metrics of  $\alpha$  diversity among the studied genotypes; Eglouvis landrace (Eglouvis 1–4) and the commercial cultivar Demetra.

| Sample     | Observed | Chao1 | ACE | Shannon | Simpson | InvSimpson | Fisher |
|------------|----------|-------|-----|---------|---------|------------|--------|
| Eglouvis 1 | 360      | 360   | 360 | 4.490   | 0.978   | 46.1       | 64.6   |
| Eglouvis 2 | 362      | 362   | 362 | 4.453   | 0.977   | 43.5       | 65.7   |
| Eglouvis 3 | 467      | 467   | 467 | 4.590   | 0.979   | 48.4       | 77.4   |
| Eglouvis 4 | 417      | 417   | 417 | 4.492   | 0.976   | 41.6       | 70.3   |
| Demetra    | 315      | 315   | 315 | 4.344   | 0.972   | 35.4       | 59.6   |

**Table S3.** Relative abundances of common taxa at phylum level for (a) Demetra, Eglouvis 1, and Eglouvis 2, and (b) Demetra, Eglouvis 3, and Eglouvis 4.

(a)

| Sample                  | Demetra | Eglouvis 1 | Eglouvis 2 |
|-------------------------|---------|------------|------------|
| <b>Acidobacteria</b>    | 0.109   | 0.729      | 0.162      |
| <b>Actinobacteria</b>   | 0.238   | 0.387      | 0.375      |
| <b>Ascomycota</b>       | 0.353   | 0.274      | 0.374      |
| <b>Bacteroidetes</b>    | 0.358   | 0.330      | 0.312      |
| <b>Crenarchaeota</b>    | 0.450   | 0.394      | 0.156      |
| <b>Firmicutes</b>       | 0.212   | 0.380      | 0.407      |
| <b>Gemmatimonadetes</b> | 0.260   | 0.352      | 0.388      |
| <b>Planctomycetes</b>   | 0.220   | 0.412      | 0.368      |
| <b>Proteobacteria</b>   | 0.276   | 0.409      | 0.315      |
| <b>Thaumarchaeota</b>   | 0.311   | 0.357      | 0.332      |
| <b>Verrucomicrobia</b>  | 0.287   | 0.371      | 0.342      |

(b)

| Sample                  | Demetra | Eglouvis 3 | Eglouvis 4 |
|-------------------------|---------|------------|------------|
| <b>Acidobacteria</b>    | 0.217   | 0.408      | 0.375      |
| <b>Actinobacteria</b>   | 0.167   | 0.469      | 0.364      |
| <b>Ascomycota</b>       | 0.184   | 0.315      | 0.501      |
| <b>Bacteroidetes</b>    | 0.233   | 0.451      | 0.316      |
| <b>Chloroflexi</b>      | 0.123   | 0.444      | 0.433      |
| <b>Crenarchaeota</b>    | 0.150   | 0.714      | 0.137      |
| <b>Firmicutes</b>       | 0.146   | 0.457      | 0.397      |
| <b>Gemmatimonadetes</b> | 0.155   | 0.476      | 0.370      |

|                 |       |       |       |
|-----------------|-------|-------|-------|
| Planctomycetes  | 0.140 | 0.546 | 0.315 |
| Proteobacteria  | 0.188 | 0.469 | 0.343 |
| Thaumarchaeota  | 0.239 | 0.358 | 0.403 |
| Verrucomicrobia | 0.192 | 0.440 | 0.368 |

Table S4. Top 10% of key species (31/158) after degree centrality analysis

| Species                                | Degree<br>Centrality (Links) |
|----------------------------------------|------------------------------|
| <i>Actinoplanes liguriensis</i>        | 20                           |
| <i>Arthrobacter</i> sp. 'SMCC G965'    | 20                           |
| <i>Arthrobacter</i> sp. 'SMCC ZAT200'  | 19                           |
| <i>Cellulomonas fimi</i>               | 20                           |
| <i>Cryobacterium psychrophilum</i>     | 18                           |
| <i>Glaciibacter superstes</i>          | 18                           |
| <i>Microbacterium oxydans</i>          | 18                           |
| <i>Micromonospora chaiyaphumensis</i>  | 19                           |
| <i>Pimelobacter simplex</i>            | 18                           |
| <i>Pseudonocardia zijingensis</i>      | 18                           |
| <i>Terracoccus luteus</i>              | 20                           |
| <i>Thermobispora bispora</i>           | 20                           |
| <i>Verticillium dahliae</i>            | 18                           |
| <i>Chitinophaga sancti</i>             | 18                           |
| <i>Cytophaga hutchinsonii</i>          | 20                           |
| <i>Hymenobacter</i> sp. VUG-A141a      | 18                           |
| <i>Pedobacter</i> sp. MJ11             | 18                           |
| <i>Salinibacter ruber</i>              | 18                           |
| <i>Bacillus halmapalus</i>             | 20                           |
| <i>Bacillus</i> sp. TA2.A1             | 20                           |
| <i>Coprothermobacter proteolyticus</i> | 18                           |
| <i>Marvinbryantia formatexigens</i>    | 20                           |
| <i>Paenibacillus polymyxa</i>          | 18                           |
| <i>Ruminococcus flavefaciens</i>       | 20                           |
| <i>Symbiobacterium thermophilum</i>    | 19                           |
| <i>Gemmatimonas aurantiaca</i>         | 18                           |
| <i>Planctomycete Zi62</i>              | 18                           |
| <i>Angiococcus disciformis</i>         | 18                           |
| <i>Corallococcus coralloides</i>       | 18                           |
| <i>Shewanella frigidimarina</i>        | 20                           |
| uncultured proteobacterium             | 18                           |

Table S5. Top 10% (16 /158) key species after closeness centrality analysis.

| Species                              | Closeness Centrality |
|--------------------------------------|----------------------|
| <i>Actinomadura pelletieri</i>       | 0.001892             |
| <i>Actinoplanes missouriensis</i>    | 0.001769             |
| <i>Amycolatopsis coloradensis</i>    | 0.001755             |
| <i>Lechevalieria aerocolonigenes</i> | 0.001892             |
| <i>Microbispora rosea</i>            | 0.001901             |
| <i>Streptosporangium roseum</i>      | 0.001755             |
| <i>Hymenobacter aerophilus</i>       | 0.001901             |
| <i>Hymenobacter antarcticus</i>      | 0.001901             |
| <i>Prolixibacter bellariivorans</i>  | 0.001641             |
| <i>Acetobacterium woodii</i>         | 0.001892             |
| <i>Bacillus firmus</i>               | 0.001641             |
| <i>Bacillus niacini</i>              | 0.00188              |
| <i>Bacillus sp. S207</i>             | 0.00188              |
| <i>Planctomyces limnophilus</i>      | 0.001901             |
| uncultured <i>Geobacter</i> sp.      | 0.001901             |
| uncultured Rhodocyclaceae bacterium  | 0.001892             |

Table S6. Top 10% of key species (15/158) after betweenness centrality.

| Species                                | Betweenness |
|----------------------------------------|-------------|
| <i>Actinoplanes liguriensis</i>        | 427.067     |
| <i>Clavibacter michiganensis</i>       | 530.2385    |
| <i>Rubrobacter xylanophilus</i>        | 538.571     |
| <i>Streptomyces maritimus</i>          | 543.7762    |
| <i>Streptomyces virginiae</i>          | 631.2566    |
| <i>Thermobispora bispora</i>           | 427.067     |
| <i>Cytophaga hutchinsonii</i>          | 631.2399    |
| <i>Thermomicrobium roseum</i>          | 461.6074    |
| <i>Bacillus halmapalus</i>             | 427.067     |
| <i>Bacillus litoralis</i>              | 424.3583    |
| <i>Bacillus sp. TA2.A1</i>             | 631.2399    |
| <i>Desulfitobacterium hafniense</i>    | 424.3583    |
| <i>Desulfonispora thiosulfatigenes</i> | 483.5359    |
| <i>Buchnera aphidicola</i>             | 541.219     |
| <i>Pseudoxanthomonas dokdonensis</i>   | 462.2815    |
